# Supplementary material for: Alkyl detection facilitated by a DNA conjugate with an α-hemolysin nanopore
Source: Royal Society of Chemistry journal article supplement (doi:10.1039/c5ra20425a), 2015-12-16
Supplement: c5ra20425a1.pdf [file c5ra20425a1.pdf]

## Supplementary Information for

# Facilitated Alkyl Detection by a DNA Conjugate with an $\alpha$ -Hemolysin Nanopore

Zheng-Li Hu<sup>a</sup>, Chan Cao<sup>a</sup>, Hui-Feng Wang<sup>b</sup> and Bing-Yong Yan<sup>c,\*</sup>

<sup>a</sup> Key Laboratory for Advanced Materials & Department of Chemistry, East China University of Science and Technology, 130 Meilong Road, Shanghai, 200237, P. R. China.

<sup>b</sup> East China University of Science and Technology, 130 Meilong Road, Shanghai, 200237, P. R. China.

<sup>c</sup> School of Information Science and Engineering, East China University of Science and Technology, 130 Meilong Road, Shanghai, 200237, P. R. China. E-mail: byyan@ecust.edu.cn

## Table of Contents

| <b>Contents</b>                 | <b>Page NO.</b> |
|---------------------------------|-----------------|
| Experimental Section            | <b>S2</b>       |
| Ultraviolet melting curve       | <b>S3</b>       |
| Analysis of Type I              | <b>S4</b>       |
| Analysis of Type II             | <b>S5</b>       |
| Analysis of Type III            | <b>S6</b>       |
| Original data of current traces | <b>S7</b>       |
| References                      | <b>S8</b>       |

## Experimental Section

**Reagents and Chemicals.**  $\alpha$ -hemolysin ( $\alpha$ -HL), decane (anhydrous,  $\geq 99\%$ ) and potassium chloride (KCl,  $\geq 99.5\%$ ) were purchased from Sigma-Aldrich (St. Louis, MO, USA). 1,2-Diphytanoyl-sn-glycero-3-phosphocholine (chloroform,  $\geq 99\%$ ) was purchased from Avanti Polar Lipids Inc. (Alabaster, AL, USA). Ethylenediaminetetraacetic acid (EDTA, 99.995%) and Tris (hydroxymethyl) aminomethane (Tris,  $\geq 99.9\%$ ) were purchased from Aladdin Reagent Co., Ltd. (Shanghai, China). The DNA conjugate, B20-(CH<sub>2</sub>)<sub>3</sub>-B20 (5'-GTCACGATGGCCAGTAGTT-CH<sub>2</sub>-CH<sub>2</sub>-CH<sub>2</sub>-TTGATGACCCGGTAGCACTG-3') was synthesized and HPLC-purified by Sangon Biotech Co., Ltd (Shanghai, China). Unless otherwise noted, materials were obtained from commercial suppliers and were used without further purification. The ultrapure water (reaching a resistivity of 18.2 M $\Omega$  cm at 25°C) was obtained using a Milli-Q System (EMD Millipore, Billerica, MA, USA).

**Electrical Recording.** We conducted the nanopore detection method according to our previous studies<sup>1, 2</sup>. The lipid bilayer membrane was formed spanning a 50  $\mu$ m orifice in the center of a 1-mL Delrin bilayer cell (Warner Instruments, Hamden, CT, USA). The cell consisted of two chambers named as *cis* and *trans*, and the *cis* side is defined as virtual ground. We added 1mL solution into the two chambers, which contains 1.0 M KCl, 1 mM EDTA and 10 mM Tris (pH = 8.00). One could estimate the stability of the bilayer by measuring its resistance and capacitance. We added the  $\alpha$ -HL near to the aperture in the *cis* chamber to form a nanopore. An easily recognized increase in ionic current would produce when the protein pore was inserted into the bilayer from the *cis* side of the cell. Also, we added the analytes from the *cis* side. Because we gave the voltage from the *trans* solution and the *cis* solution was grounded, the negatively charged DNA could be driven to translocate through the pore from *cis* side to *trans* side. A ChemClamp (Dagan Corporation, Minneapolis, MN, USA) instrument was utilized to amplify and record the nanopore currents with a low-pass Bessel filter of 3 KHz. Then, a DigiData 1440 converter and a PC running PClamp 10.3 (Axon Instruments, Forest City, CA, USA) were used to gain the data at a sampling rate of 100 KHz. The Origin 8.0 (OriginLab Corporation, Northampton, MA, USA) and a home-designed software <http://people.bath.ac.uk/yl505/nanoporeanalysis.html> were applied to analyze the data<sup>3</sup>. Nanopore measurements were conducted at 24  $\pm$  2 °C.

## Ultraviolet melting curve

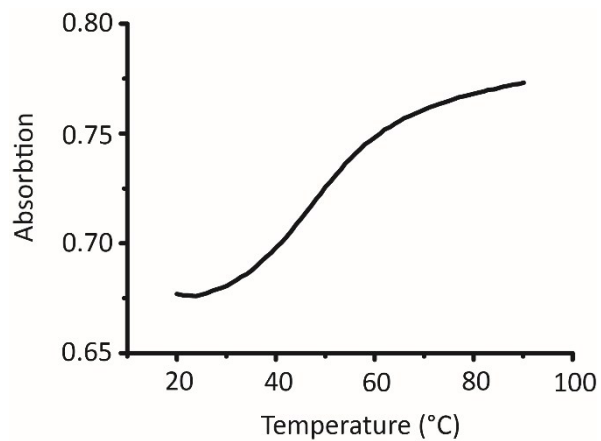

**Figure S1.** The melting curve of B20-(CH<sub>2</sub>)<sub>3</sub>-B20. The melting temperature ( $T_m$ ) of B20-(CH<sub>2</sub>)<sub>3</sub>-B20 was 47.02 °C. The ultraviolet melting experiment was measured to investigate the stability of the DNA hairpin structure by monitoring the absorbance at 260 nm using Cary 100 Ultraviolet-Visible spectrometer in 1.0 M KCl buffered with 10 mM Tris and 1 mM EDTA (pH = 8.00). The concentration of B20-(CH<sub>2</sub>)<sub>3</sub>-B20 was fixed in 1 μM.

## Analysis of Type I

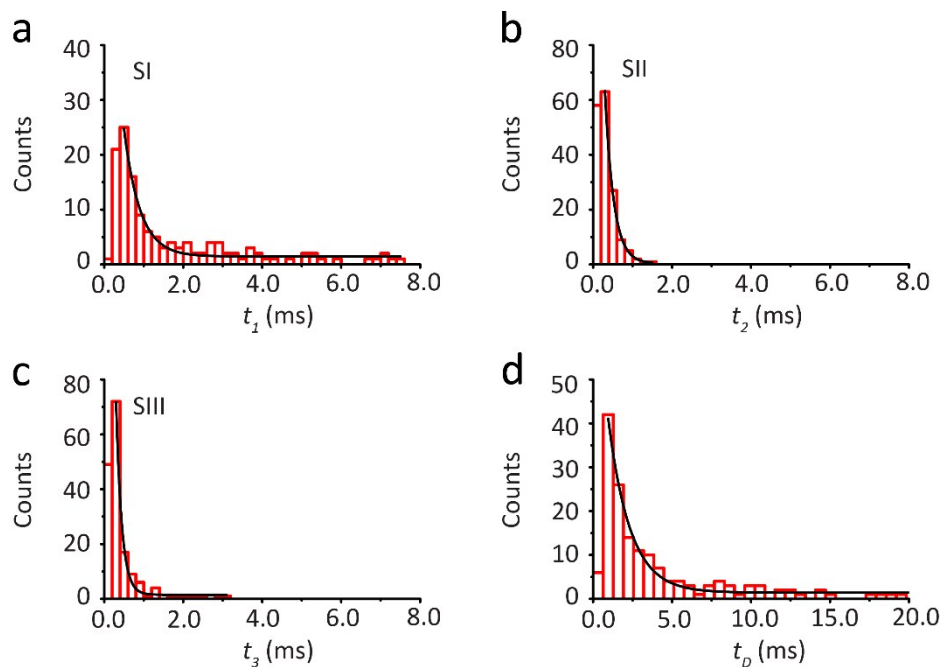

**Figure S2.** (a) The duration histograms of SI for Type I; (b) The duration histograms of SII for Type I; (c) The duration histograms of SIII for Type I; (d) The entire duration time of Type I for B20-(CH<sub>2</sub>)<sub>3</sub>-B20. All of the duration histograms were fitted by an Exponential function. The experiments were measured in 1.0 M KCl buffered with 10 mM Tris and 1 mM EDTA (pH = 8.00) at an applied potential of + 150 mV.

## Analysis of Type II

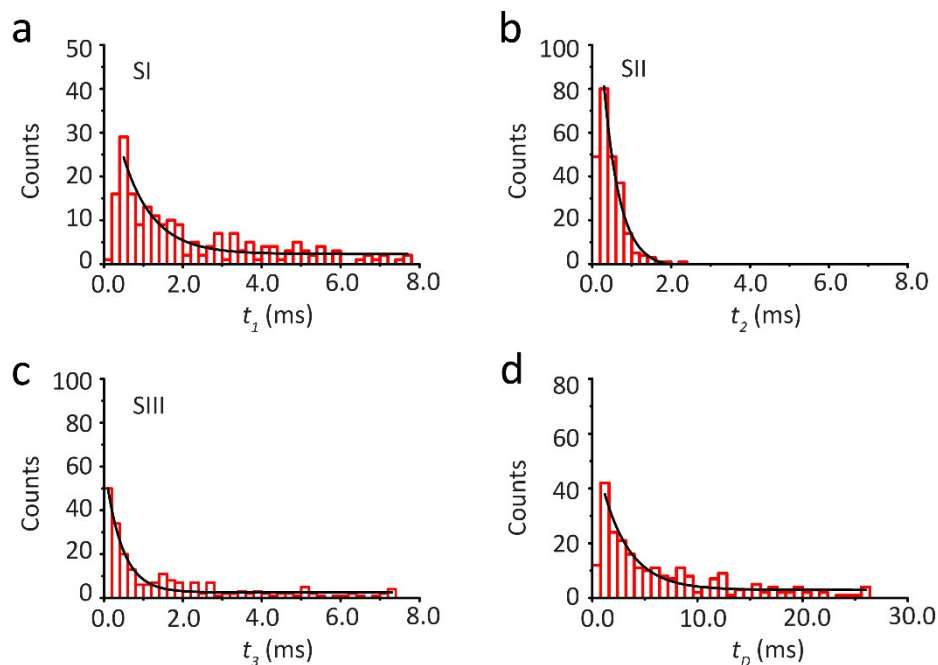

**Figure S3.** (a) The duration histograms of SI for Type II; (b) The duration histograms of SII for Type II; (c) The duration histograms of SIII for Type II; (d) The entire duration time of Type II for B20-(CH<sub>2</sub>)<sub>3</sub>-B20. All of the duration histograms were fitted by an Exponential function. The experiments were measured in 1.0 M KCl buffered with 10 mM Tris and 1 mM EDTA (pH = 8.00) at an applied potential of + 150 mV.

## Analysis of Type III

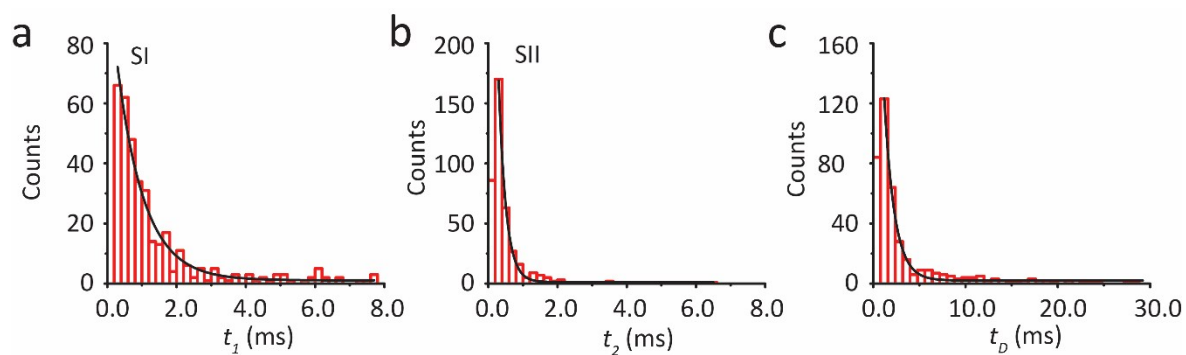

**Figure S4.** (a) The duration histograms of SI for Type III; (b) The duration histograms of SII for Type III; (c) The entire duration time of Type III for B20-(CH<sub>2</sub>)<sub>3</sub>-B20. All of the duration histograms were fitted by an Exponential function. The experiments were measured in 1.0 M KCl buffered with 10 mM Tris and 1 mM EDTA (pH = 8.00) at an applied potential of +150 mV.

## Original data of current traces

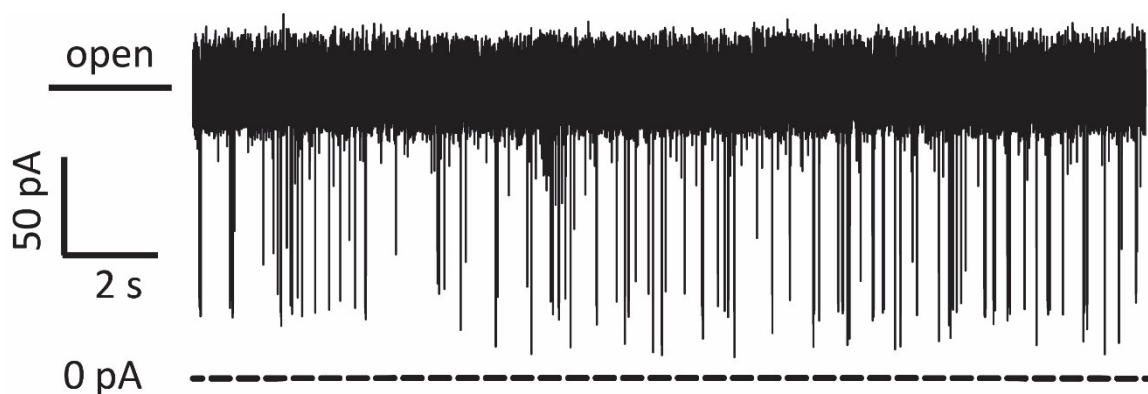

**Figure S5.** The raw data of current traces for the translocation of B20-(CH<sub>2</sub>)<sub>3</sub>-B20 molecules through the  $\alpha$ -HL pore in the presence of analytes in the *cis* compartment. The experiments were measured in 1.0 M KCl buffered with 10 mM Tris and 1 mM EDTA (pH = 8.00) at an applied potential of + 150 mV.

## References

1. Y. L. Ying, C. Cao, Z. Gu, and Y. T. Long, *Anal. Chem.*, 2014, **86**, 11946-11950.
2. D. W. Li, Y. L. Ying, Y. Liu, S. K. Dey, H. B. Kraatz and Y. T. Long, *Chem. Commun.*, 2012, **48**, 8784–8786.
3. Y. L. Ying, Z. Gu, C. Cao, P. G. He, and Y. T. Long, *Anal. Chem.*, 2015, **87**, 907-913.
